# Supplementary material
Source: PubMed Central journal article supplement (PMC7054739)
Supplement: mmc1.pdf [file mmc1.pdf]

**Supplemental Information**

**circCAMSAP1 Promotes Tumor Growth  
in Colorectal Cancer via the miR-328-5p/E2F1 Axis**

**Chi Zhou, Hua-shan Liu, Feng-wei Wang, Tuo Hu, Zhen-xing Liang, Nan Lan, Xiao-wen He, Xiao-bin Zheng, Xiao-jian Wu, Dan Xie, Xian-rui Wu, and Ping Lan**

## Supplemental Figures and Legends

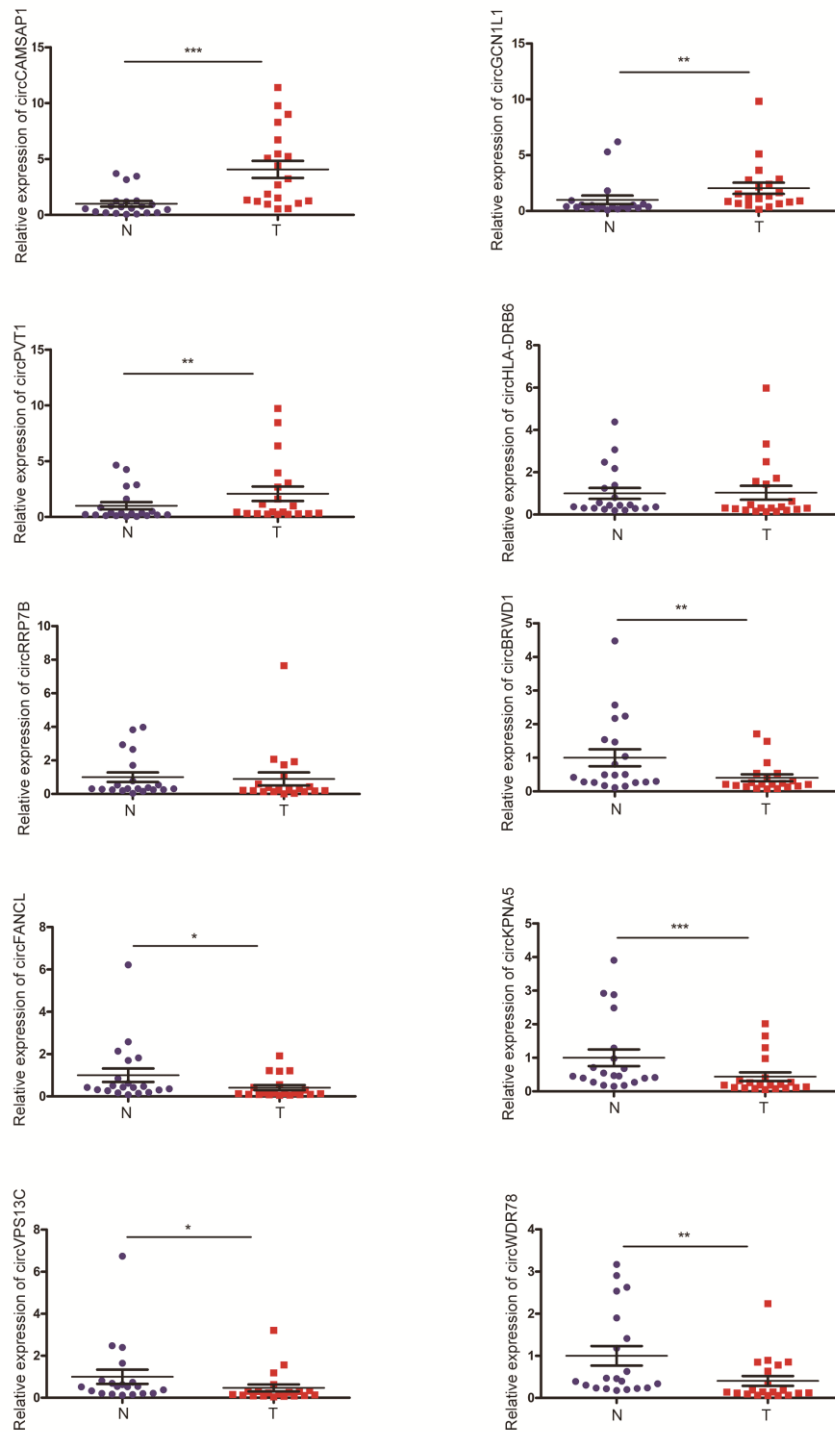

### Supplemental Figure S1, related to Figure 1, CircRNA expression in CRC

Expression of candidate circRNAs in 20 pairs of CRC tissues compared with the matched non-tumor tissues. N, non-tumor tissues; T, tumor tissues. \*\* $p < 0.01$ , \*\*\* $p < 0.001$  by Student's *t*-test. Error bars indicate *S.E.M.*

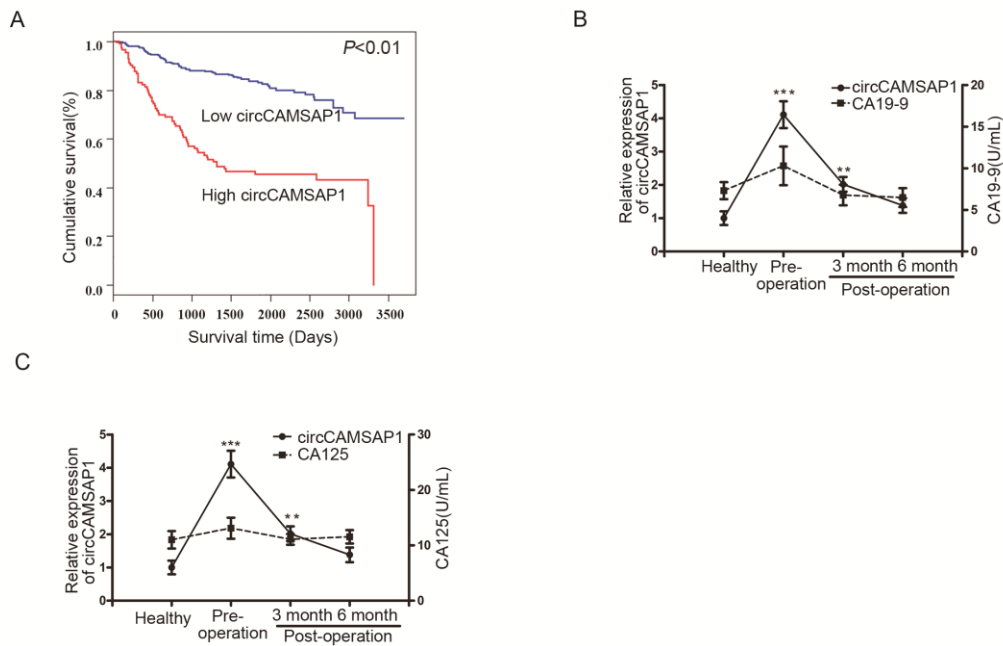

**Supplemental Figure S2, related to Figure 2, The expression of circCAMSAP1 in CRC tissue and serum.**

A. Kaplan-Meier analysis of the correlation between circCAMSAP1 expression and disease-free survival. Kaplan-Meier survival curves for CRC patients with high (n=113) and low (n=311) expression of circCAMSAP1, determined by ISH. The optimal survival cut point was determined by X-Tile statistical software. B and C. The solid line showed the expression of circCAMSAP1 in the serum of healthy people (n=20) and CRC patients (n=20) pre- and post-operation, validated by RT-ddPCR. The dashed line showed the levels of CA19-9 (B) and CA125 (C) in the serum of healthy people (n=20) and CRC patients pre- and post-operation (n=20).

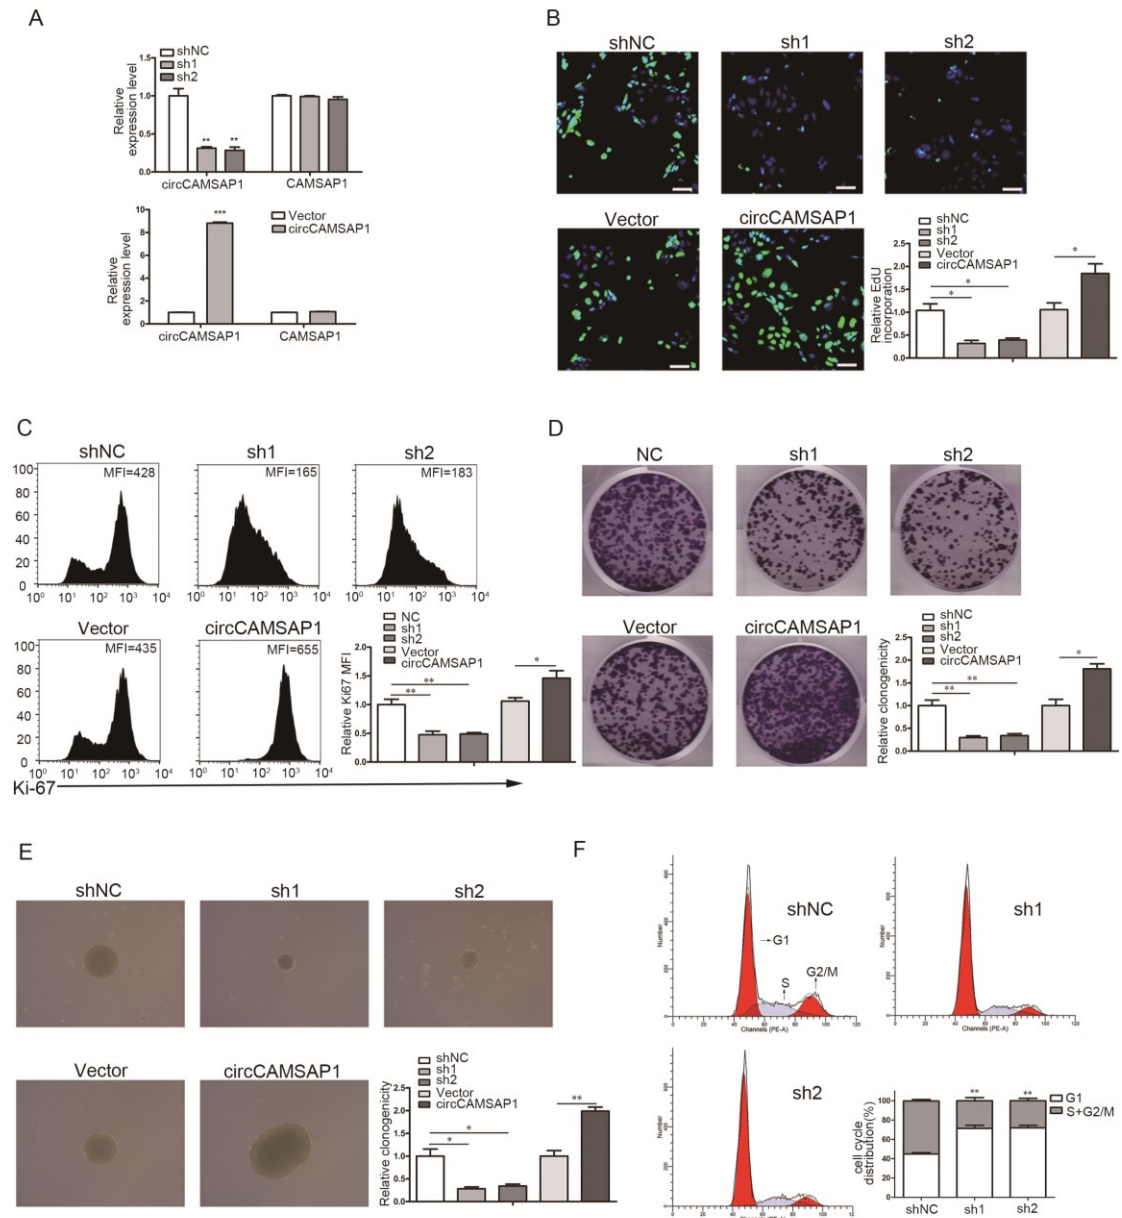

**Supplemental Figure S3, related to Figure 3, CircCAMSAP1 promotes the proliferation of CRC cells.**

A. qRT-PCR analysis of circCAMSAP1 and CAMSAP1 RNA expression of circCAMSAP1 knockdown or overexpression stable cell lines. B-E. The proliferation of DLD1 cells with circCAMSAP1 knockdown or overexpression shown by the EdU (B), FACS analysis of Ki-67 staining (C), plate colony formation (D) and soft agar colony formation (E) assays. Scale bar, 50  $\mu$ m. F. FACS cell cycle analysis of DLD1 cells with circCAMSAP1 knockdown, compared to shNC-treated DLD1 cells, using PI DNA staining. \* $p < 0.05$ , \*\* $p < 0.01$ , \*\*\* $p < 0.001$  by Student's *t*-test. Error bars indicate *S.D.*

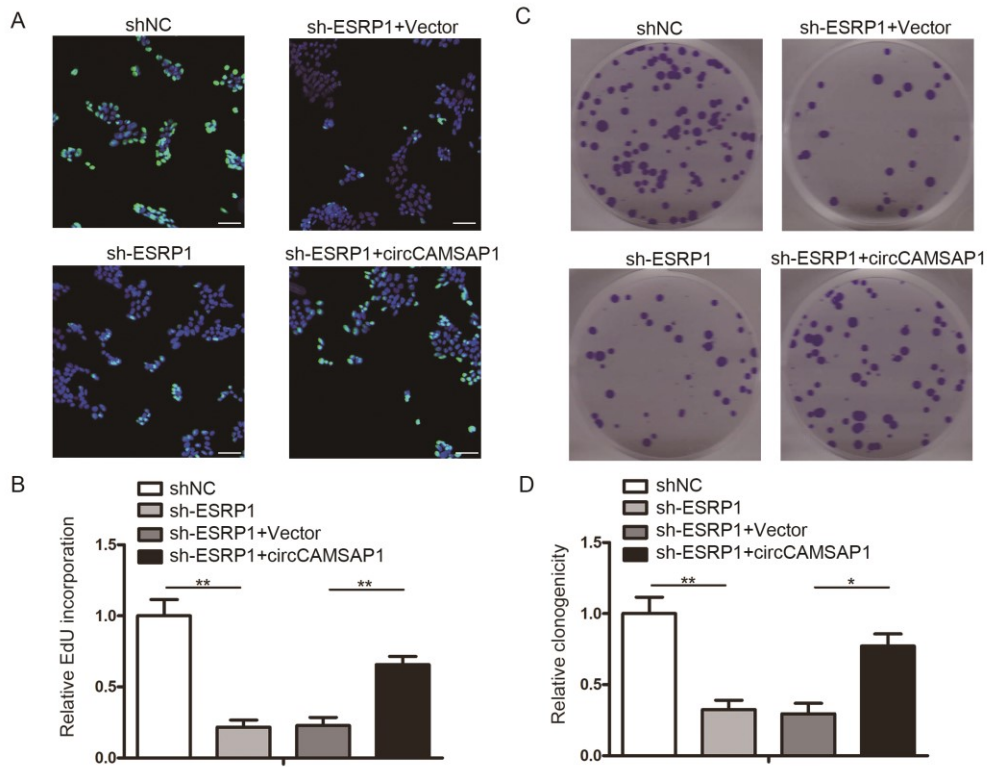

**Supplemental Figure S4. Related to Figure 4, Overexpression of circCAMSAP1 rescues the proliferation-inhibitory effect of ESRP1 knockdown in DLD1 cells.**

The proliferation of ESRP1-silenced DLD1 cells transfected with or without circCAMSAP1 overexpression vector were assessed by EdU (A-B) and plate colony formation (C-D) assays. Scale bar, 50  $\mu\text{m}$ . \* $p < 0.05$ , \*\* $p < 0.01$  by Student's *t*-test. Error bars indicate S.D.

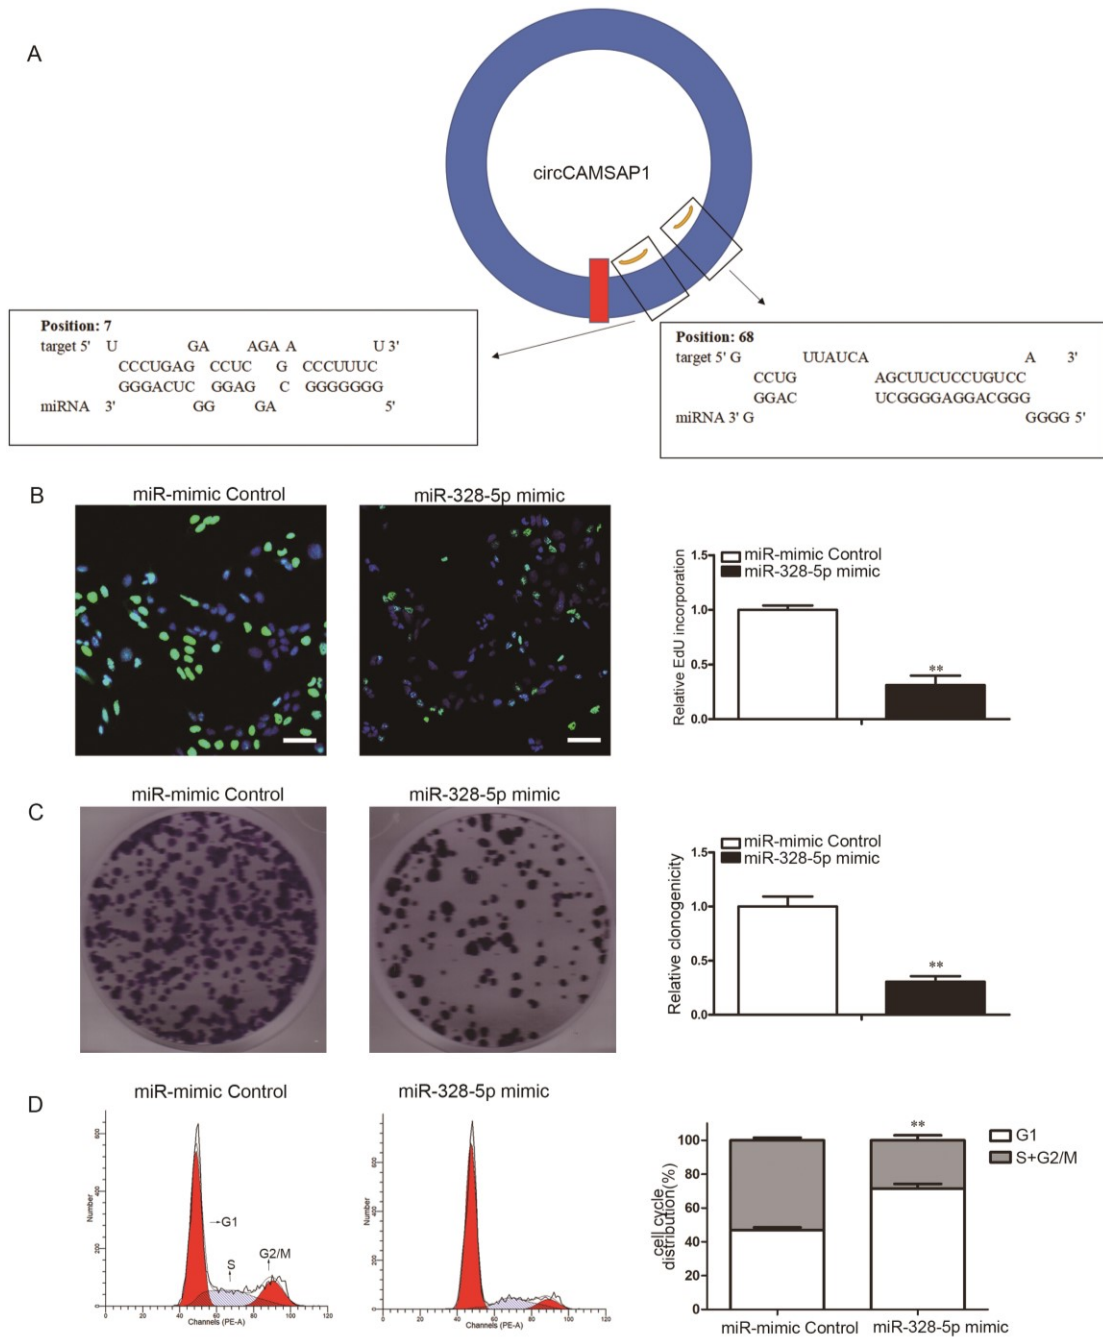

**Supplemental Figure S5. Related to Figure 5, Biological functions of miR-328-5p.**

A. Schematic diagram showing the putative binding sites of the miR-328-5p associated with circCAMSAP1. B and C. The proliferation of HCT15 cells transfected with miR-328-5p mimics, as shown by EdU (B), and plate colony formation (C) assays. Scale bar, 50  $\mu$ m. D. FACS cell cycle analysis of HCT15 cells transfected with miR-328-5p mimics. \*\* $p < 0.01$ , \*\*\*  $p < 0.001$  by Student's *t*-test. Error bars indicate S.D.

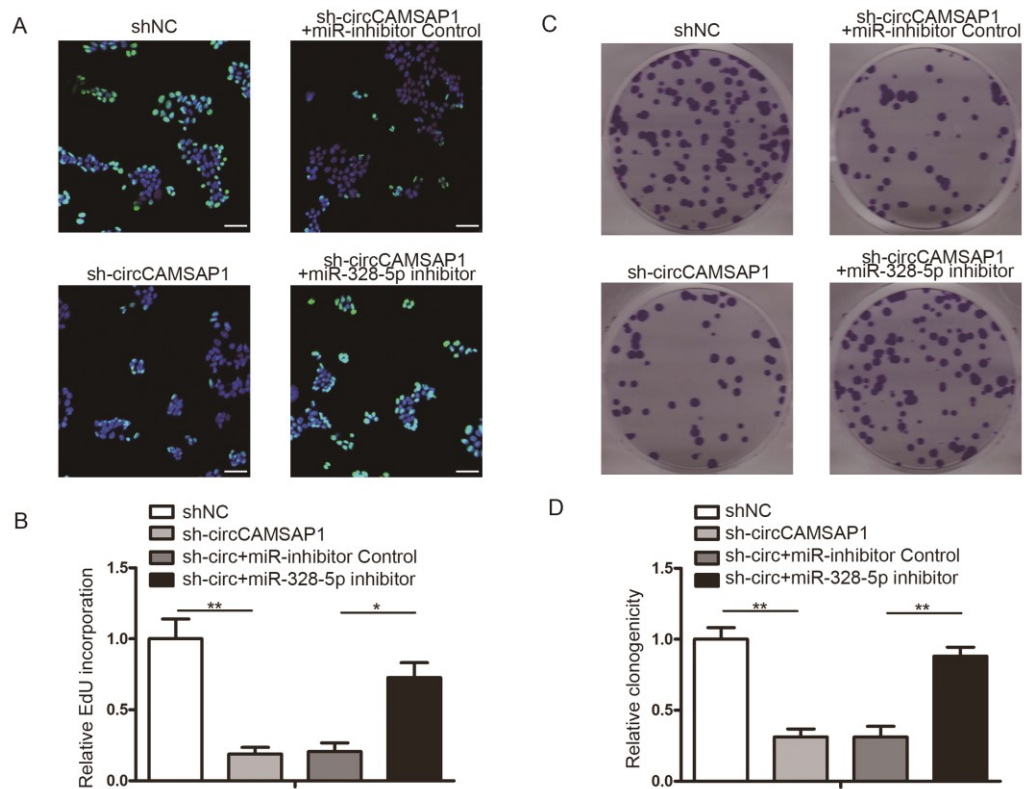

**Supplemental Figure S6, related to the Figure 5, miR-328-5p inhibitor partially abolishes the effects of circCAMSAP1 silence on cell growth of DLD1 cells.**

The proliferation of sh1-mediated circCAMSAP1-silenced DLD1 cells transfected with or without miR-328-5p inhibitor were assessed by EdU (A-B) and plate colony formation (C-D) assays. Scale bar, 50  $\mu\text{m}$ . \* $p < 0.05$ , \*\* $p < 0.01$  by Student's *t*-test. Error bars indicate S.D.

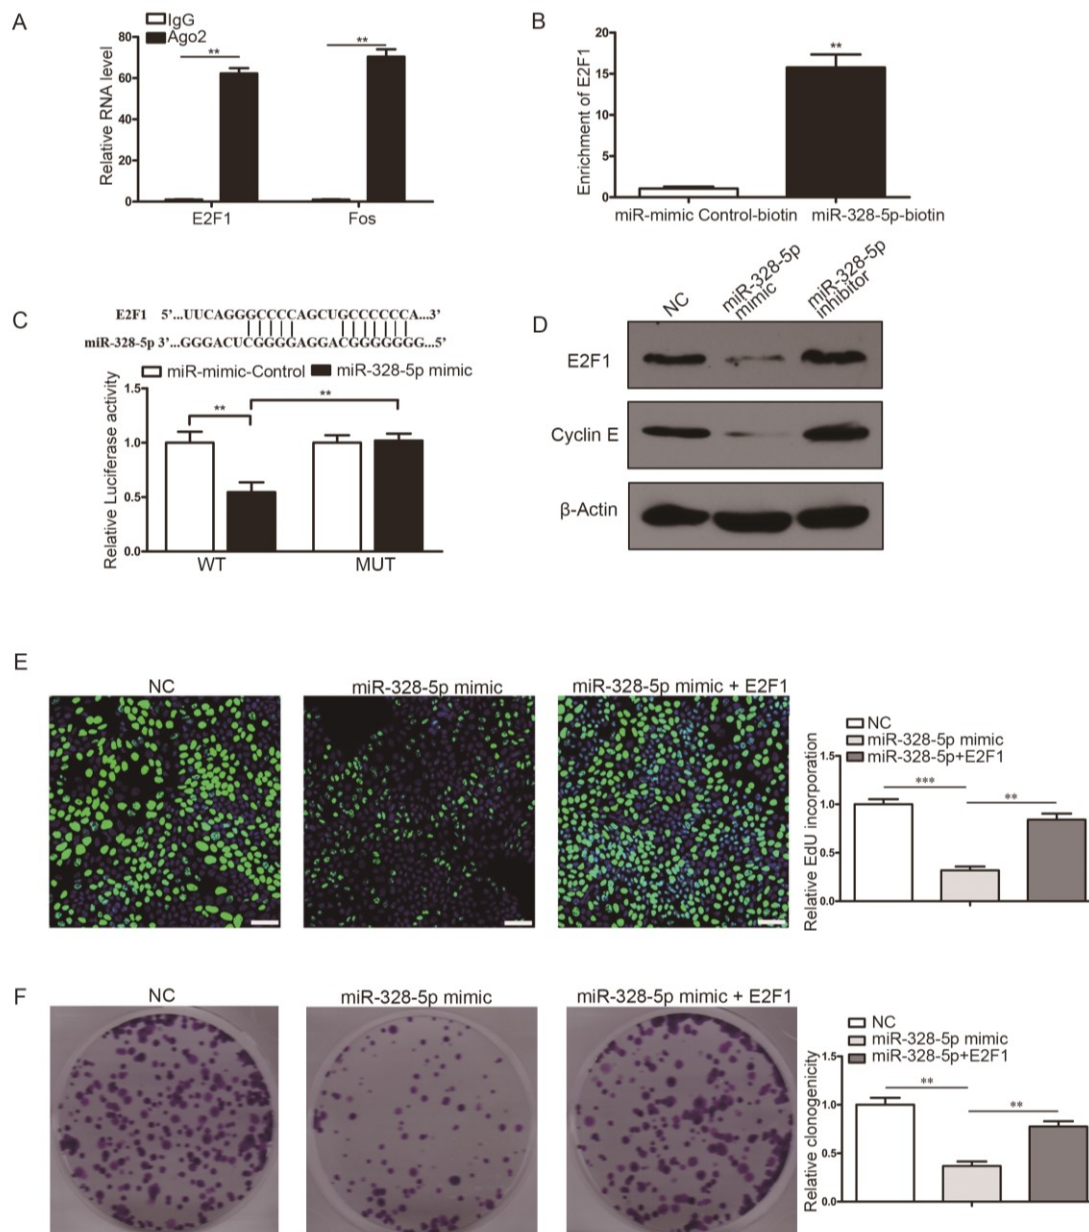

**Supplemental Figure S7, related to the Figure 5, E2F1 was a direct target of miR-328-5p.**

A. RIP assay using an antibody against Ago2, followed by qRT-PCR, followed by detection of circCAMSAP1 and Fos (positive control). B. MiRNA biotin pulldown assay using biotin-coupled miR-328-5p, followed by qRT-PCR. C. The luciferase activities of HCT15 co-transfected with wild-type (WT) or mutant (MUT) E2F1 luciferase reporter vector and miR-328-5p mimics or control miR-mimics. D. The expression level of E2F1 and Cyclin E after transfected with miR-328-5p mimics and inhibitor were measured by western blot. E, F. The proliferation of HCT15 cells transfected with miR-328-5p mimics or co-transfected with miR-328-5p mimics and E2F1 overexpression vector were measure by EdU (E) and plate colony formation (F) assays. \*\* $p < 0.01$ , \*\*\* $p < 0.001$  by Student's *t*-test.



Error bars indicate S.D.

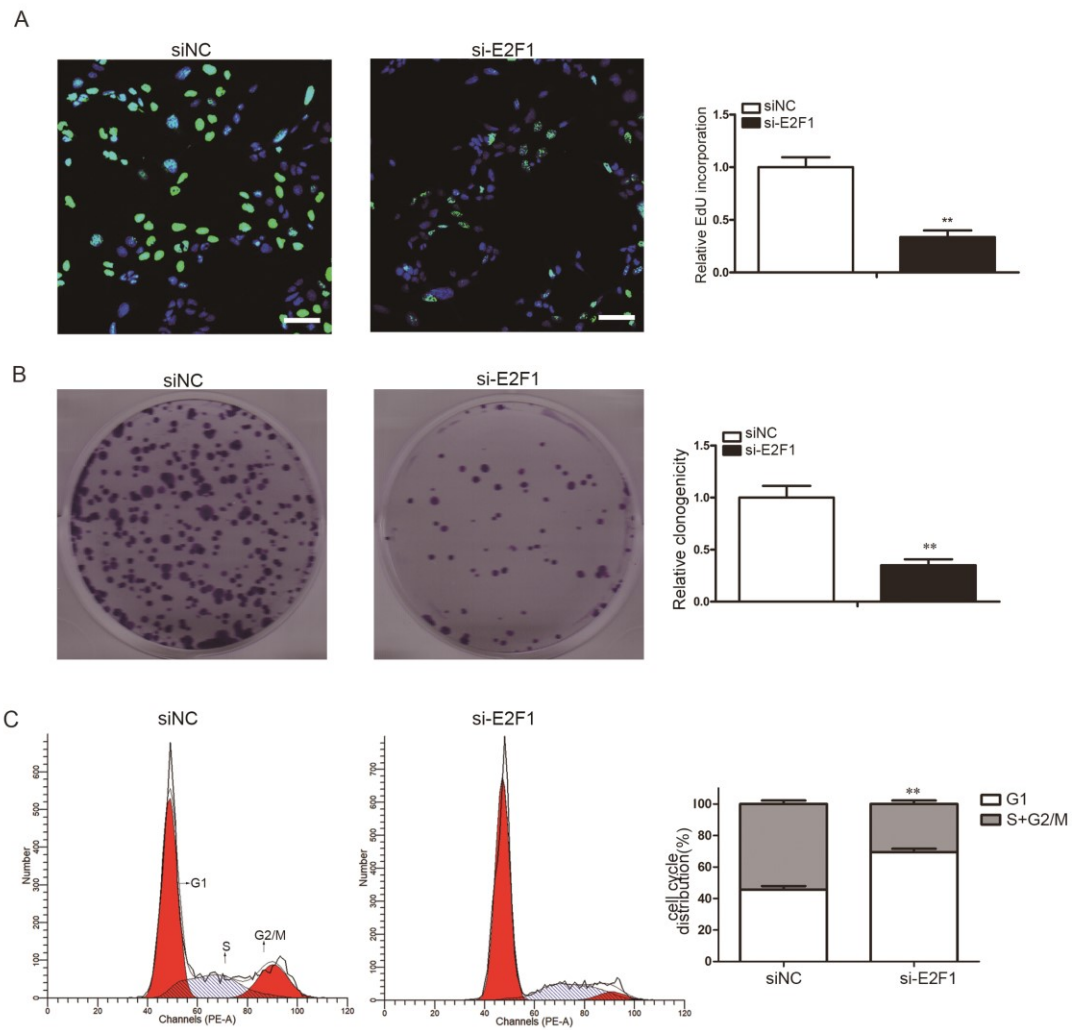

**Supplemental Figure S8, related to the Figure 5, biological functions of E2F1.**

A and B. The proliferation of HCT15 cells after E2F1 silence, as shown by EdU (A), and plate colony formation (B) assays. Scale bar, 50  $\mu$ m. C. Silence of E2F1 induces G1 phase cell cycle arrest.

\*\* $p < 0.01$ , \*\*\* $p < 0.001$  by Student's *t*-test. Error bars indicate S.D.

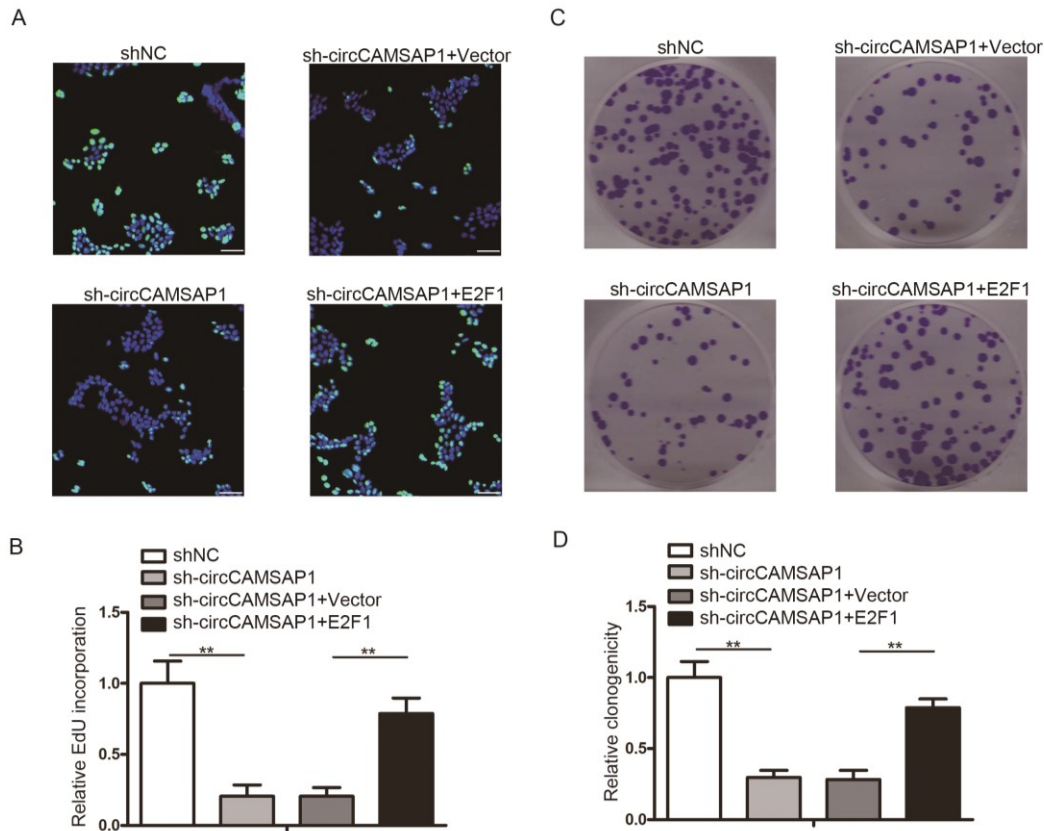

**Supplemental Figure S9, related to the Figure 6, the E2F1 overexpression partially abolishes the effects of circCAMSAP1 silence on cell growth of DLD1 cells.**

The proliferation of sh1 mediated circCAMSAP1-silenced DLD1 cells transfected with or without E2F1 overexpression vector were assessed by EdU (A-B) and plate colony formation (C-D) assays. Scale bar, 50  $\mu$ m. \*\*  $p < 0.01$  by Student's *t*-test. Error bars indicate S.D.

### Supplemental Tables

**Supplemental Table S1. Correlation between expression of circCAMSAP1 and patients' clinicopathological variables in CRC patients**

| Variables   | All cases(N=424) | circCAMSAP1 expression (%) |              | P-value |
|-------------|------------------|----------------------------|--------------|---------|
|             |                  | Low (n=311)                | High (n=113) |         |
| Age (years) |                  |                            |              | 0.062   |
| $\leq 60$   | 218              | 151(69.3)                  | 67(30.7)     |         |
| $> 60$      | 206              | 160(77.7)                  | 46(22.3)     |         |

|              |     |           |           |        |
|--------------|-----|-----------|-----------|--------|
| Gender       |     |           |           | 0.912  |
| Male         | 238 | 174(73.1) | 64(26.9)  |        |
| Female       | 186 | 137(73.7) | 49(26.3)  |        |
| T stage      |     |           |           | <0.001 |
| T1/T2        | 80  | 77(96.2)  | 3(3.8)    |        |
| T3/T4        | 344 | 234(68.5) | 110(32.0) |        |
| N stage      |     |           |           | <0.001 |
| N0           | 248 | 207(83.5) | 41(16.5)  |        |
| N1/N2        | 176 | 104(59.1) | 72(40.9)  |        |
| M stage      |     |           |           | <0.001 |
| M0           | 389 | 304(78.1) | 85(21.9)  |        |
| M1           | 35  | 7(20.0)   | 28(80.0)  |        |
| TNM stage    |     |           |           | <0.001 |
| I/II         | 232 | 204(87.9) | 28(12.1)  |        |
| III/IV       | 192 | 107(55.7) | 85(45.3)  |        |
| CEA(ng/mL)   |     |           |           | <0.001 |
| <5           | 279 | 222(79.6) | 57(20.4)  |        |
| ≥5           | 145 | 89(61.4)  | 56(38.6)  |        |
| CA19-9(U/mL) |     |           |           | <0.001 |
| <37.5        | 318 | 248(78.0) | 70(22.0)  |        |
| ≥37.5        | 106 | 63(59.4)  | 43(40.6)  |        |

**Supplemental Table S2. Primers and RNA sequences used in this study**

| Name                | Sequence             | Application |
|---------------------|----------------------|-------------|
| circCAMSAP1-forward | GTGTCAAGCGCTTCTCAACG | qRT-PCR     |
| circCAMSAP1-reverse | GCTGGACAGGAGAAGCTTGA | qRT-PCR     |
| circPVT1-forward    | CCGACTCTTCCTGGTGAAGC | qRT-PCR     |

|                            |                          |         |
|----------------------------|--------------------------|---------|
| circPVT1- reverse          | CAGCGTTATTCCCCAGACCA     | qRT-PCR |
| circGCN1L1-<br>forward     | CTGGATGCTTTGGGACGAGTT    | qRT-PCR |
| circGCN1L1-<br>reverse     | ATTGACCAGAGCCTCTCAGC     | qRT-PCR |
| circHLA-DRB6-<br>forward   | CACAACACTACGGGGTTGGTGA   | qRT-PCR |
| circHLA-DRB6-<br>reverse   | CTATGGAGACCACCGCAGC      | qRT-PCR |
| circRRP7B-<br>forward      | AGCCCAAAGGAGTCAAGGTC     | qRT-PCR |
| circRRP7B- reverse         | ACCCCTCCCGCAGTACTAAC     | qRT-PCR |
| circKPNA5-<br>forward      | CAACAGCTAACAGCAACACAGA   | qRT-PCR |
| circKPNA5-<br>reverse      | ACATTTCTGCGTTTGAACAACCTG | qRT-PCR |
| circWDR78-<br>forward      | AGGGCAGTTTACAAGGTCAGT    | qRT-PCR |
| circWDR78-<br>reverse      | AGACTTCTTTGGTTGTGTGGC    | qRT-PCR |
| circBRDW1-<br>forward      | AGAGGTTCAAGCAACGGCA      | qRT-PCR |
| circBRDW1-<br>reverse      | CATCATGGACTCTCCTCCTTCC   | qRT-PCR |
| circFANCL-<br>forward      | GCTGTATGCACTACCTCCTCC    | qRT-PCR |
| circFANCL-<br>reverse      | TCAGGCAACACTATCCTAAGGTG  | qRT-PCR |
| circVPS13C-<br>forward     | AAGCACAGGCAGTTACTCAAG    | qRT-PCR |
| circVPS13C-<br>reverse     | TTCCAGTAGGCGCTAAGACT     | qRT-PCR |
| Linear-CAMSAP1-<br>forward | GGGCGCTTTACTGCTACT       | qRT-PCR |

|                            |                        |                      |
|----------------------------|------------------------|----------------------|
| Linear-CAMSAP1-<br>reverse | ACAGGTGGTTGTGGATTGT    | qRT-PCR              |
| Pre-CAMSAP1-a-<br>forward  | GATGCTGCCTGGTCCAAAAA   | qRT-PCR              |
| Pre-CAMSAP1-a-<br>reverse  | CCCAGCATCCTCTTTCTGACAT | qRT-PCR              |
| Pre-CAMSAP1-b-<br>forward  | TGCCCTGCCTAGATGTGGTG   | qRT-PCR              |
| Pre-CAMSAP1-b-<br>reverse  | CAGACAAGGTGTGCTGCTCT   | qRT-PCR              |
| RPS6KL1-forward            | GCAGATTCGCAACAGGGTG    | qRT-PCR              |
| RPS6KL1-reverse            | ACGCCATTCTGATAGTGGTTGA | qRT-PCR              |
| COPZ2-forward              | CGTTGCAGGAACCTTCCC     | qRT-PCR              |
| COPZ2-reverse              | TGCTGTTCTGTAGACGATGGT  | qRT-PCR              |
| GUSB-forward               | GACACGCTAGAGCATGAGGG   | qRT-PCR              |
| GUSB-reverse               | GGGTGAGTGTGTTGTTGATGG  | qRT-PCR              |
| GAPDH-forward              | CGCTCTCTGCTCCTCCTGTC   | qRT-PCR              |
| GAPDH-reverse              | ATCCGTTGACTCCGACCTTAC  | qRT-PCR              |
| E2F1-forward               | CCATGGGTGGTCAGATGGTG   | qRT-PCR              |
| E2F1-reverse               | ACATCAGTGAAGGTCCCCCA   | qRT-PCR              |
| si-circCAMSAP1#1           | TCAACAAGATAACATCCCT    | siRNA target<br>site |
| si-circCAMSAP1#2           | GGATCAACAAGATAACATC    | siRNA target<br>site |
| si-circPVT1                | GCTGGGCTTGAGGCCTGATCT  | siRNA target<br>site |

|               |                       |                   |
|---------------|-----------------------|-------------------|
| si-circGCN1L1 | AAGCCAGGGGCTGATGGAACT | siRNA target site |
| si-circKPNA5  | GCTGCTTTCTAAAGATGCCAT | siRNA target site |
| si-circWDR78  | AGTTTCACAGGAACAATGCCA | siRNA target site |
| si-circBRDW1  | AAGTATCAGGATGATAGTGAT | siRNA target site |
| si-circFANCL  | GTTGGGATAAGGAAGAGACTT | siRNA target site |
| si-circVPS13C | GAAATTCAGACTGCAAATGAA | siRNA target site |
| si-E2F1       | GGCCCGATCGATGTTTTCC   | siRNA target site |
| si-ESRP1#1    | GGACAGCATTGCCCTATTA   | siRNA target site |
| si-ESRP1#2    | CAGTGAGCAATGAACTGAA   | siRNA target site |
| si-ESRP2#1    | GGGTAAGCGATACATTGAA   | siRNA target site |
| si-ESRP2#2    | GGGAAGTCAAGACAATGGT   | siRNA target site |
| si-QKI#1      | GGGACCTATTGTTTCAGTTA  | siRNA target site |
| si-QKI#2      | GCTGCTCCAAGGATCATTA   | siRNA target site |
| si-NOVA1#1    | GGTTCTCATACCTAGTTAT   | siRNA target site |
| si-NOVA1#2    | GGTGCAAGGATACAGATCT   | siRNA target site |
| si-NOVA2#1    | CCAAGTCCAAAGACTTCTA   | siRNA target site |
| si-NOVA2#2    | GCATCCAGATCTCCAAGAA   | siRNA target site |
| si-MEX3A#1    | GTGTTTCCCTTCACTCTCT   | siRNA target site |

|                                  |                                                              |                          |
|----------------------------------|--------------------------------------------------------------|--------------------------|
| si-MEX3A#2                       | CTAGTGAAGACACGTACAA                                          | siRNA target site        |
| si-MEX3B#1                       | GGCTCCTTAAAGAAACGCT                                          | siRNA target site        |
| si-MEX3B#2                       | GCGAAGACCAATACTTACA                                          | siRNA target site        |
| si-CELF1#1                       | TTTGGCTGCACTAGCTGCT                                          | siRNA target site        |
| si-CELF1#2                       | GAGCCAACCTGTTCATCTA                                          | siRNA target site        |
| si-RBM47#1                       | CACGGTGGCTCCAAACGTTCA                                        | siRNA target site        |
| si-RBM47#2                       | GGATCTCTCCTTAAGCCAACA                                        | siRNA target site        |
| circCAMSAP1 probe                | CAGGGATGTTATCTTGTTGATCCAGAAC                                 | FISH, ISH, RNA pull down |
| Pre-CAMSAP1 probe-1              | ACTTCCTATCTCACTCCTCCCTAATGACCTAATTCAGT<br>CTCATGGCTAGAAATACC | RNA pull down            |
| Pre-CAMSAP1 probe-2              | TGGACCAGGCAGCATCAAACCTTTGACATGAACCACG<br>CTACTTAATCTTGCCACTG | RNA pull down            |
| Pre-CAMSAP1 probe-3              | GAGCACCGGCCTGGCTCTGCATGTGCAAGCTAACTAT<br>CAGTAACTCCAGAACCATC | RNA pull down            |
| Pre-CAMSAP1 probe-4              | CAGCAACAGCCTGAAAAGTCACTTACAAATGCACAGC<br>AAATGAGAAACGTGACCAA | RNA pull down            |
| miR-328-5p probe                 | CCCTGAGCCCCTCCTGCCCCC                                        | FISH                     |
| Biotin-miR-3116 mimic sense      | UGCCUGGAACAUAGUAGGGACU                                       | RNA pull down            |
| Biotin-miR-3116 mimic anti-sense | AGUCCCUACUAUGUUCCAGGCA                                       | RNA pull down            |
| Biotin-miR-328-5p mimic sense    | GGGGGGGCAGGAGGGGCUCAGGG                                      | RNA pull down            |

Biotin-miR-328-5p  
mimic anti-sense

CCCTGAGCCCCTCCTGCCCCCCCC

RNA  
pull down

**Supplemental Table S3. MiRNA microarray after circRNA pull down**

| Name                              | Fold     |            | ForeGround- |            | Normalized |            |       |
|-----------------------------------|----------|------------|-------------|------------|------------|------------|-------|
|                                   | change   | ForeGround | BackGround  | ForeGround | BackGround | ForeGround |       |
|                                   | circ vs. | NC         | NC          | circ       | NC         | circ       |       |
| hsa-miR-3116                      | 4.97     | 579.50     | 2813.00     | 527.50     | 2766.00    | 2.41       | 11.97 |
| hsa-miR-328-5p                    | 4.32     | 3406.00    | 15329.00    | 3357.00    | 15284.00   | 15.33      | 66.16 |
| hsa-miR-323b-5p                   | 3.53     | 3583.50    | 13180.00    | 3530.50    | 13132.50   | 16.12      | 56.85 |
| hsa-miR-550a-3-5p/hsa-miR-550a-5p | 3.32     | 1182.00    | 4006.00     | 1131.50    | 3960.50    | 5.17       | 17.15 |
| hsa-miR-4500                      | 2.94     | 4347.00    | 13369.00    | 4296.50    | 13322.50   | 19.62      | 57.67 |
| hsa-miR-3664-3p                   | 2.91     | 1873.00    | 5641.00     | 1820.50    | 5593.00    | 8.31       | 24.21 |
| hsa-miR-4728-5p                   | 2.82     | 1404.50    | 4073.00     | 1354.00    | 4027.00    | 6.18       | 17.43 |
| hsa-miR-625-5p                    | 2.80     | 2915.00    | 8496.50     | 2864.50    | 8453.00    | 13.08      | 36.59 |
| hsa-miR-378g                      | 2.65     | 1676.50    | 4600.00     | 1627.50    | 4556.00    | 7.43       | 19.72 |
| hsa-miR-3182                      | 2.61     | 6128.00    | 16755.00    | 6078.00    | 16710.50   | 27.75      | 72.34 |
| hsa-miR-4270                      | 2.60     | 2093.00    | 5649.50     | 2044.50    | 5606.00    | 9.34       | 24.27 |
| hsa-miR-4447                      | 2.60     | 1636.00    | 4388.50     | 1584.00    | 4341.00    | 7.23       | 18.79 |
| hsa-miR-431-5p                    | 2.56     | 1576.50    | 4171.00     | 1528.00    | 4126.50    | 6.98       | 17.86 |
| hsa-miR-410-5p                    | 2.55     | 2274.00    | 6035.50     | 2223.00    | 5990.50    | 10.15      | 25.93 |
| hsa-miR-4459                      | 2.48     | 1027.00    | 2597.50     | 977.00     | 2553.00    | 4.46       | 11.05 |
| hsa-let-7a-5p                     | 2.36     | 5956.50    | 14777.00    | 5907.00    | 14733.00   | 26.97      | 63.78 |
| hsa-miR-4534                      | 2.33     | 2603.00    | 6314.00     | 2552.50    | 6267.00    | 11.66      | 27.13 |
| hsa-miR-98-5p                     | 2.32     | 8259.50    | 20107.00    | 8205.50    | 20058.50   | 37.47      | 86.83 |



|                |      |         |         |         |         |       |       |
|----------------|------|---------|---------|---------|---------|-------|-------|
| hsa-let-7c-5p  | 2.29 | 3311.50 | 7938.50 | 3263.00 | 7895.00 | 14.90 | 34.18 |
| hsa-miR-149-3p | 2.20 | 3457.50 | 7968.00 | 3409.50 | 7924.50 | 15.57 | 34.31 |
| hsa-miR-3650   | 2.17 | 2346.00 | 5300.00 | 2297.00 | 5256.00 | 10.49 | 22.75 |
| hsa-miR-4444   | 2.08 | 1340.50 | 2874.00 | 1292.00 | 2831.00 | 5.90  | 12.26 |
| hsa-miR-204-3p | 2.08 | 3690.00 | 8014.50 | 3638.50 | 7967.50 | 16.61 | 34.49 |
| hsa-miR-4299   | 2.07 | 1291.50 | 2762.00 | 1242.00 | 2718.00 | 5.67  | 11.77 |

**Supplemental Table S4. Whole transcriptome deep sequencing in circCAMSAP1 silencing cell line**

| Name            | Gene ID   | sh-circCAMSAP1 | NC    | Fold Change |
|-----------------|-----------|----------------|-------|-------------|
| GPR75-ASB3      | 100302652 | 0              | 2.41  | 0.00        |
| CORO7-PAM16     | 100529144 | 0              | 1.74  | 0.00        |
| TNFAIP8L2-SCNM1 | 100534012 | 0              | 1.32  | 0.00        |
| C21orf33        | 8209      | 0              | 1.21  | 0.00        |
| OR2A42          | 402317    | 0              | 0.85  | 0.00        |
| LOC107984152    | 107984152 | 0              | 0.68  | 0.00        |
| GSTT2           | 2953      | 0              | 0.67  | 0.00        |
| TICAM2          | 353376    | 0              | 0.66  | 0.00        |
| CKMT1B          | 1159      | 0              | 0.49  | 0.00        |
| PRODH           | 5625      | 0              | 0.49  | 0.00        |
| LOC102724994    | 102724994 | 0              | 0.42  | 0.00        |
| TBC1D3C         | 414060    | 0              | 0.38  | 0.00        |
| ZNF559-ZNF177   | 100529215 | 0              | 0.34  | 0.00        |
| ANKRD20A2       | 441430    | 0              | 0.32  | 0.00        |
| HSPE1-MOB4      | 100529241 | 0              | 0.3   | 0.00        |
| LOC107986354    | 107986354 | 0              | 0.23  | 0.00        |
| POTEF           | 728378    | 0              | 0.22  | 0.00        |
| CDIP1           | 29965     | 0.02           | 0.35  | 0.06        |
| TBC1D3H         | 729877    | 0.21           | 2.56  | 0.08        |
| U2AF1L5         | 102724594 | 1.45           | 14.69 | 0.10        |
| LOC105371591    | 105371591 | 0.07           | 0.7   | 0.10        |
| FBXW10          | 10517     | 0.07           | 0.48  | 0.15        |
| LOC107985728    | 107985728 | 0.06           | 0.39  | 0.15        |
| TAS2R14         | 50840     | 0.22           | 1.3   | 0.17        |

|              |           |       |        |      |
|--------------|-----------|-------|--------|------|
| FAM198B      | 51313     | 0.07  | 0.34   | 0.21 |
| ATOH8        | 84913     | 0.38  | 1.8    | 0.21 |
| ATP5MF-PTCD1 | 100526740 | 0.84  | 3.67   | 0.23 |
| POC1B-GALNT4 | 100528030 | 0.23  | 0.97   | 0.24 |
| LOC107986352 | 107986352 | 0.39  | 1.62   | 0.24 |
| EGR2         | 1959      | 1.03  | 4.04   | 0.25 |
| MSMP         | 692094    | 1.06  | 4.08   | 0.26 |
| LOC107987464 | 107987464 | 0.2   | 0.76   | 0.26 |
| DND1         | 373863    | 0.38  | 1.43   | 0.27 |
| FZD8         | 8325      | 0.27  | 0.99   | 0.27 |
| TTC34        | 100287898 | 0.11  | 0.39   | 0.28 |
| LOC105373102 | 105373102 | 1.77  | 6.17   | 0.29 |
| CDH7         | 1005      | 0.55  | 1.91   | 0.29 |
| TSPAN8       | 7103      | 2.84  | 9.71   | 0.29 |
| SAMD11       | 148398    | 0.44  | 1.43   | 0.31 |
| SLC30A3      | 7781      | 0.29  | 0.94   | 0.31 |
| EVX1         | 2128      | 0.83  | 2.63   | 0.32 |
| CXCL3        | 2921      | 1.64  | 5.17   | 0.32 |
| GRIN1        | 2902      | 0.33  | 1.03   | 0.32 |
| KLHL14       | 57565     | 0.31  | 0.95   | 0.33 |
| HOXB8        | 3218      | 15.61 | 46.82  | 0.33 |
| NFATC1       | 4772      | 0.2   | 0.59   | 0.34 |
| CYP1B1       | 1545      | 1.13  | 3.33   | 0.34 |
| LFNG         | 3955      | 0.61  | 1.79   | 0.34 |
| HMOX1        | 3162      | 47.23 | 138.55 | 0.34 |
| RASD1        | 51655     | 0.57  | 1.66   | 0.34 |
| EGR3         | 1960      | 0.73  | 2.12   | 0.34 |
| NDP          | 4693      | 0.5   | 1.43   | 0.35 |
| URGCP-MRPS24 | 100534592 | 1.61  | 4.59   | 0.35 |
| PSD4         | 23550     | 1.8   | 5.11   | 0.35 |
| PIGR         | 5284      | 0.68  | 1.92   | 0.35 |
| DGCR8        | 54487     | 3.63  | 10.02  | 0.36 |
| LSMEM1       | 286006    | 0.9   | 2.47   | 0.36 |
| CXCL1        | 2919      | 2.74  | 7.51   | 0.36 |
| HOXB4        | 3214      | 8.81  | 24.09  | 0.37 |
| LOC105371191 | 105371191 | 0.93  | 2.52   | 0.37 |
| HOXB5        | 3215      | 8.9   | 24.06  | 0.37 |
| CCNE2        | 9134      | 1.4   | 3.75   | 0.37 |
| CTGF         | 1490      | 3.35  | 8.94   | 0.37 |
| HOXB3        | 3213      | 23.18 | 61.77  | 0.38 |
| EME2         | 197342    | 3.69  | 9.66   | 0.38 |
| TRIM73       | 375593    | 2.15  | 5.62   | 0.38 |

|                |           |       |        |      |
|----------------|-----------|-------|--------|------|
| CRB2           | 286204    | 0.93  | 2.41   | 0.39 |
| MYO7B          | 4648      | 0.22  | 0.57   | 0.39 |
| FNTB           | 2342      | 1.86  | 4.79   | 0.39 |
| CLDN2          | 9075      | 17.9  | 45.66  | 0.39 |
| EBF4           | 57593     | 1.83  | 4.66   | 0.39 |
| RPS6KL1        | 83694     | 0.81  | 2.03   | 0.40 |
| RASL11A        | 387496    | 1.69  | 4.23   | 0.40 |
| GGT1           | 2678      | 6.99  | 17.49  | 0.40 |
| FOS            | 2353      | 20.87 | 51.63  | 0.40 |
| FOSB           | 2354      | 2.85  | 7.04   | 0.40 |
| ARMCX5-GPRASP2 | 100528062 | 0.41  | 1.01   | 0.41 |
| CLDN5          | 7122      | 0.79  | 1.94   | 0.41 |
| BEND3          | 57673     | 1.04  | 2.55   | 0.41 |
| E2F1           | 1869      | 5.37  | 13.09  | 0.41 |
| ELAC1          | 55520     | 1.05  | 2.51   | 0.42 |
| CDH17          | 1015      | 5.73  | 13.59  | 0.42 |
| FBP1           | 2203      | 3.51  | 8.29   | 0.42 |
| HOXD4          | 3233      | 2.04  | 4.81   | 0.42 |
| FSIP2          | 401024    | 0.14  | 0.33   | 0.42 |
| MFSD3          | 113655    | 11.29 | 26.5   | 0.43 |
| FOXN4          | 121643    | 0.6   | 1.39   | 0.43 |
| PITX2          | 5308      | 12.01 | 27.38  | 0.44 |
| TMEM178B       | 100507421 | 0.81  | 1.84   | 0.44 |
| BHLHA15        | 168620    | 5.72  | 12.99  | 0.44 |
| TSPOAP1        | 9256      | 1.41  | 3.19   | 0.44 |
| SLC25A13       | 10165     | 4.42  | 9.95   | 0.44 |
| EGR1           | 1958      | 32.57 | 72.82  | 0.45 |
| C5             | 727       | 0.85  | 1.89   | 0.45 |
| PRMT6          | 55170     | 3.32  | 7.35   | 0.45 |
| FGFBP1         | 9982      | 4.14  | 9.1    | 0.45 |
| EPDR1          | 54749     | 8.72  | 19.1   | 0.46 |
| COPZ2          | 51226     | 2.12  | 4.63   | 0.46 |
| LOC107984110   | 107984110 | 1.13  | 2.46   | 0.46 |
| HOXB6          | 3216      | 52.75 | 113.31 | 0.47 |
| ASCL2          | 430       | 27.31 | 58.54  | 0.47 |
| FIBCD1         | 84929     | 1.29  | 2.75   | 0.47 |
| LOC102723996   | 102723996 | 2.39  | 5.09   | 0.47 |
| CDX2           | 1045      | 38.97 | 82.55  | 0.47 |
| DLX1           | 1745      | 0.86  | 1.82   | 0.47 |
| MCIDAS         | 345643    | 1.81  | 3.8    | 0.48 |
| CHPF2          | 54480     | 10.23 | 21.4   | 0.48 |
| CRIP2          | 1397      | 2.89  | 6.04   | 0.48 |
| PANK1          | 53354     | 3.23  | 6.73   | 0.48 |

|              |           |        |        |      |
|--------------|-----------|--------|--------|------|
| NFKBIZ       | 64332     | 3.4    | 7.07   | 0.48 |
| CBWD6        | 644019    | 2.74   | 5.69   | 0.48 |
| CALCA        | 796       | 4.69   | 9.64   | 0.49 |
| FAM86C1      | 55199     | 3.9    | 8.01   | 0.49 |
| SRSF2        | 6427      | 40.67  | 83.48  | 0.49 |
| FAM222A      | 84915     | 1.17   | 2.4    | 0.49 |
| WDR77        | 79084     | 8.94   | 18.28  | 0.49 |
| SYK          | 6850      | 3.69   | 7.54   | 0.49 |
| AUTS2        | 26053     | 0.95   | 1.94   | 0.49 |
| PTPRG        | 5793      | 4.02   | 8.19   | 0.49 |
| NPY4R        | 5540      | 2.83   | 5.74   | 0.49 |
| CD83         | 9308      | 3.59   | 7.25   | 0.50 |
| HTR1D        | 3352      | 0.95   | 1.91   | 0.50 |
| IL20RA       | 53832     | 2.27   | 4.56   | 0.50 |
| TBX3         | 6926      | 19.16  | 38.33  | 0.50 |
| RGPD1        | 400966    | 0.41   | 0.82   | 0.50 |
| LURAP1L      | 286343    | 3.46   | 1.73   | 2.00 |
| LTB4R2       | 56413     | 3.62   | 1.81   | 2.00 |
| CXorf40A     | 91966     | 8.29   | 4.12   | 2.01 |
| SELENOM      | 140606    | 43.54  | 21.63  | 2.01 |
| H1F0         | 3005      | 244.39 | 121.25 | 2.02 |
| ITGAX        | 3687      | 2.51   | 1.24   | 2.02 |
| WNK4         | 65266     | 1.56   | 0.77   | 2.03 |
| ABCA12       | 26154     | 2.29   | 1.13   | 2.03 |
| APOBEC3B     | 9582      | 88.84  | 43.79  | 2.03 |
| RORC         | 6097      | 3.42   | 1.68   | 2.04 |
| CABYR        | 26256     | 5.44   | 2.67   | 2.04 |
| PRPH         | 5630      | 4.94   | 2.42   | 2.04 |
| RNF112       | 7732      | 0.84   | 0.41   | 2.05 |
| EFNA3        | 1944      | 21.43  | 10.4   | 2.06 |
| IL15         | 3600      | 2.73   | 1.32   | 2.07 |
| C1QL1        | 10882     | 5.59   | 2.7    | 2.07 |
| MT1E         | 4493      | 283.01 | 136.28 | 2.08 |
| NR1D1        | 9572      | 47.39  | 22.76  | 2.08 |
| CCDC107      | 203260    | 15.06  | 7.2    | 2.09 |
| LGALS1       | 3956      | 273.41 | 130.12 | 2.10 |
| BNIP3L       | 665       | 91.22  | 43.36  | 2.10 |
| UGT1A6       | 54578     | 8.25   | 3.92   | 2.10 |
| RAB3A        | 5864      | 13.37  | 6.3    | 2.12 |
| ELF3         | 1999      | 90.66  | 42.69  | 2.12 |
| KCNN4        | 3783      | 3.57   | 1.68   | 2.13 |
| C4orf3       | 401152    | 52.24  | 24.48  | 2.13 |
| LOC102724770 | 102724770 | 15.14  | 7.09   | 2.14 |
| LOC101927789 | 101927789 | 2.62   | 1.22   | 2.15 |

|               |           |        |         |      |
|---------------|-----------|--------|---------|------|
| LDHA          | 3939      | 658.94 | 306.34  | 2.15 |
| ECE2          | 9718      | 15.92  | 7.4     | 2.15 |
| THEMIS2       | 9473      | 5.62   | 2.61    | 2.15 |
| FAM162A       | 26355     | 113.16 | 52.09   | 2.17 |
| YPEL4         | 219539    | 2.61   | 1.2     | 2.18 |
| GPI           | 2821      | 313.96 | 144.05  | 2.18 |
| GBE1          | 2632      | 20.42  | 9.35    | 2.18 |
| HK2           | 3099      | 80.87  | 36.83   | 2.20 |
| FUT11         | 170384    | 15.2   | 6.91    | 2.20 |
| PGK1          | 5230      | 419.53 | 190.01  | 2.21 |
| DKK1          | 22943     | 12.57  | 5.67    | 2.22 |
| PADI2         | 11240     | 1.52   | 0.68    | 2.24 |
| KRT15         | 3866      | 10.04  | 4.45    | 2.26 |
| DHDH          | 27294     | 8.54   | 3.78    | 2.26 |
| AHNAK2        | 113146    | 4.93   | 2.18    | 2.26 |
| SLC16A3       | 9123      | 93.73  | 41.28   | 2.27 |
| PTCD1         | 26024     | 6.64   | 2.91    | 2.28 |
| CD74          | 972       | 5.75   | 2.5     | 2.30 |
| PFKFB3        | 5209      | 32.3   | 13.99   | 2.31 |
| PER1          | 5187      | 28.41  | 12.25   | 2.32 |
| ENO2          | 2026      | 98.25  | 41.19   | 2.39 |
| NOS3          | 4846      | 1.56   | 0.65    | 2.40 |
| CDA           | 978       | 24.41  | 10.15   | 2.40 |
| IQC�          | 80726     | 1.72   | 0.71    | 2.42 |
| JMJD7-PLA2G4B | 8681      | 5.34   | 2.19    | 2.44 |
| PRF1          | 5551      | 3.68   | 1.49    | 2.47 |
| CYP4F3        | 4051      | 3.42   | 1.37    | 2.50 |
| MT2A          | 4502      | 810.14 | 323.67  | 2.50 |
| ALDOA         | 226       | 2801.2 | 1108.74 | 2.53 |
| PPFIA4        | 8497      | 1.73   | 0.68    | 2.54 |
| TMEM40        | 55287     | 7.25   | 2.82    | 2.57 |
| CLIP4         | 79745     | 1.81   | 0.7     | 2.59 |
| P4HA1         | 5033      | 129.44 | 49.94   | 2.59 |
| APOL3         | 80833     | 2.04   | 0.78    | 2.62 |
| SH3D21        | 79729     | 16.24  | 6.18    | 2.63 |
| SLCO3A1       | 28232     | 1.5    | 0.57    | 2.63 |
| SLC2A14       | 144195    | 1.3    | 0.49    | 2.65 |
| NPAS1         | 4861      | 3.38   | 1.26    | 2.68 |
| MAT1A         | 4143      | 0.8    | 0.29    | 2.76 |
| CA9           | 768       | 128.81 | 46.63   | 2.76 |
| KRTAP3-1      | 83896     | 9.85   | 3.51    | 2.81 |
| PFKFB4        | 5210      | 24.49  | 8.67    | 2.82 |
| LOC105374299  | 105374299 | 13.5   | 4.76    | 2.84 |

|                 |           |        |       |       |
|-----------------|-----------|--------|-------|-------|
| ANGPTL4         | 51129     | 40.6   | 14.01 | 2.90  |
| SLC2A1          | 6513      | 211.69 | 73.01 | 2.90  |
| GAL3ST1         | 9514      | 3.09   | 1.06  | 2.92  |
| MYH15           | 22989     | 0.35   | 0.12  | 2.92  |
| KRT81           | 3887      | 2.11   | 0.72  | 2.93  |
| CYP1A1          | 1543      | 6.19   | 2.05  | 3.02  |
| IFI27           | 3429      | 9.38   | 3.04  | 3.09  |
| ACAP1           | 9744      | 1.59   | 0.51  | 3.12  |
| SDS             | 10993     | 13.52  | 4.32  | 3.13  |
| SAA2            | 6289      | 26.53  | 8.23  | 3.22  |
| CD68            | 968       | 18.73  | 5.77  | 3.25  |
| ASB9            | 140462    | 1.34   | 0.41  | 3.27  |
| DUOXA1          | 90527     | 0.63   | 0.19  | 3.32  |
| ADM             | 133       | 32.63  | 9.83  | 3.32  |
| PADI1           | 29943     | 0.67   | 0.2   | 3.35  |
| HILPDA          | 29923     | 73.63  | 21.67 | 3.40  |
| LYPD3           | 27076     | 5.37   | 1.56  | 3.44  |
| MT1X            | 4501      | 109.71 | 30.34 | 3.62  |
| LOC101928422    | 101928422 | 1.24   | 0.34  | 3.65  |
| SAA1            | 6288      | 90.03  | 24.54 | 3.67  |
| NDRG1           | 10397     | 318.6  | 85.47 | 3.73  |
| SLC2A3          | 6515      | 342.92 | 91.62 | 3.74  |
| FGD2            | 221472    | 1.06   | 0.28  | 3.79  |
| BHLHE40         | 8553      | 60.46  | 15.82 | 3.82  |
| SH2D3C          | 10044     | 1.6    | 0.41  | 3.90  |
| ZBED2           | 79413     | 0.82   | 0.19  | 4.32  |
| ASIC4           | 55515     | 1.8    | 0.41  | 4.39  |
| STC1            | 6781      | 0.93   | 0.21  | 4.43  |
| AKR1C3          | 8644      | 4.98   | 1.1   | 4.53  |
| ANKRD37         | 353322    | 107.29 | 23.18 | 4.63  |
| DACT3           | 147906    | 0.89   | 0.19  | 4.68  |
| APLN            | 8862      | 1.18   | 0.24  | 4.92  |
| AZGP1           | 563       | 2.9    | 0.56  | 5.18  |
| ALDOC           | 230       | 19.23  | 3.35  | 5.74  |
| PHOSPHO2-KLHL23 | 100526832 | 2.73   | 0.36  | 7.58  |
| IGFL1           | 374918    | 3.76   | 0.47  | 8.00  |
| SERF1A          | 8293      | 1.51   | 0.17  | 8.88  |
| EDN2            | 1907      | 15.69  | 1.55  | 10.12 |
| HGD             | 3081      | 0.6    | 0.04  | 15.00 |
| DCT             | 1638      | 0.18   | 0     | Inf   |
| GPRASP2         | 114928    | 0.21   | 0     | Inf   |
| LOC102723623    | 102723623 | 0.22   | 0     | Inf   |
| TBC1D3I         | 102724862 | 0.42   | 0     | Inf   |

|              |           |      |      |       |
|--------------|-----------|------|------|-------|
| LOC107984153 | 107984153 | 0.49 | 0    | Inf   |
| SNAP91       | 9892      | 0.65 | 0    | Inf   |
| HLA-DRB1     | 3123      | 0.81 | 0    | Inf   |
| LOC107985109 | 107985109 | 0.87 | 0    | Inf   |
| LOC101927345 | 101927345 | 2.77 | 0.03 | 92.33 |
| RNF103-CHMP3 | 100526767 | 1.13 | 0    | Inf   |
| LOC107986353 | 107986353 | 1.15 | 0    | Inf   |
| LOC107987477 | 107987477 | 1.39 | 0    | Inf   |
| FSBP         | 100861412 | 1.96 | 0    | Inf   |

### Supplemental Table S5. Up-regulated genes in CRC tissues

#### Supplemental Methods

##### RNA isolation, qRT-PCR and ddPCR

According to the manufacturer's protocol, total RNA from cells and tissues were extracted using TRIzol (Invitrogen, CA, USA). The nuclear and cytoplasmic fractions were isolated by NE-PER™ Nuclear and Cytoplasmic Extraction Reagents (Thermo Scientific). The cell-free RNA was extracted and purified from serum using miRNeasy Serum/Plasma Kit (Qiagen, Helden, Germany) based on the manufacturer's protocol. For mRNA and circRNA, total RNAs were reversely transcribed using reverse transcription kit (Takara, Otsu, Japan). For miRNA, total RNAs were reversely transcribed via RiboBio reverse transcription kit (Guangzhou, China). For miRNA, the expression was determined by stem-loop primer SYBR Green quantitative real time-PCR (RiboBio, Guangzhou, China), and U6 was used as reference gene. For circRNA and mRNA of cells and tissues, quantification was performed by a SYBR Green PCR Kit (Takara, Otsu, Japan), and GAPDH and GUSB were served as the reference genes for cells and tissues respectively. The  $2^{-\Delta\Delta CT}$  method was applied to calculate relative expression. For circRNA of serum, the ddPCR was constructed on the Nacia Crystal System (Stilla Technologies, France) using ddPCR EvaGreen (PexBio, Beijing, China) and qPCR ToughMix (PexBio, Beijing, China) and its expression was compared using absolute copy number. The primer sequences were shown in Table S2.

##### RNase R treatment

RNase R (Epicentre Technologies, Madison, WI, USA) was used to assess the stability of circRNA. Total RNA (2 µg) was mixed with 0.6ul 10 × RNase R Reaction Buffer and 0.2 µl RNase R or

DEPC-treated water (control group). The samples were then incubated at 37 °C for 15 min<sup>1</sup>. The expression levels of circCAMSAP1 and linear CAMSAP1 were detected by qRT-PCR. GAPDH in the control group was used as an internal control<sup>2,3</sup>.

#### **Actinomycin D assay**

For the half-life of circRNA assessment, the gene transcription was blocked by adding 2mg/mL Actinomycin D (Sigma-Aldrich, St. Louis, MO, USA) to the cell culture medium<sup>4</sup>. DMSO was used as a negative control. Cells were harvested at 0, 4, 8, 12, 24h and the stability of circCAMSAP1 and linear CAMSAP1 was analyzed by qRT-PCR<sup>5</sup>.

#### **Oligonucleotide transfection**

SiRNAs, miRNA-328-5p mimics and inhibitors were purified and synthesized by RiboBio (Guangzhou, China) or Gene-Pharma (Shanghai, China). Transfection was performed using Lipofectamine RNAiMAX Reagent (Thermo Fisher Scientific, Massachusetts, USA). The RNA sequences used were listed in Table S2.

#### **Plasmids construction and stable transfection**

To generate the circCAMSAP1 overexpression construct, the full-length circCAMSAP1 cDNA was cloned into pLO-ciR (Genesee Biotech, Guangzhou, China). For circCAMSAP1 minigene reporters, full-length of human circCAMSAP1 along with 0.8 kb endogenous 5'-flanking intron and 0.8 kb 3'-flanking intron with or without ESRP1-binding site mutation was subcloned into the pCDH-CMV-GFP vector (Genesee Biotech, Guangzhou, China). For E2F1 and ESRP1-expressing vectors, the full-length ORF sequences of these three genes were respectively subcloned into the pCDH-CMV-MCS-EF1-Puro vectors. For construction of sh-circCAMSAP1 and sh-ESRP1, si-circCAMSAP1 and si-ESRP1 sequences were cloned into pLKO.1 vectors. All constructs were verified by sequencing. For stable transfection, lentiviral containing above vectors was generated in HEK293T cells. After infected with lentivirus, all cell lines were selected with 1-2 ug/mL puromycin.

#### **Whole transcriptome deep sequencing**

Total RNA from HCT15 cells with or without circCAMSAP1 silencing was isolated by RNeasy Mini Kit (Qiagen, Germany) and subsequently tested by an Agilent 2200 Bioanalyzer for quality control. According to the manufacturer's protocol, the sequencing library of each RNA sample was prepared and then the expression levels of genes were quantified (BGI, Shenzhen, China). Differential expression genes for RNA-sequencing were analyzed using the R/Bioconductor software package



(limma).

### **Tissue microarray (TMA) and *in situ* hybridization (ISH)**

424 samples of CRC FFPE tissue were used to construct TMA as previously described<sup>6</sup>. Digoxin-labeled circCAMSAP1 probes were synthesized by Sangon Biotech (Shanghai, China). The expression level of circCAMSAP1 in TMA was detected by digoxin-labeled circCAMSAP1 probes using ISH Detection Kit (BosterBio, Pleasanton, CA). Briefly, the sections were dewaxed and rehydrated, after which the sections were digested with pepsin, hybridized with the digoxin-labeled circCAMSAP1 probes at 37°C overnight. Then the sections were incubated overnight at 4°C with anti-digoxin antibody, after which the sections were stained with nitro blue tetrazolium/5-bromo-4-chloro-3-indolyphosphate. The expression of circCAMSAP1 were quantitated as follow: Proportion score: 1-100 (1%-100%); Intensity score: 0 (negative); 1 (weak); 2 (intermediate); 3 (strong). Total score= Proportion score × Intensity score<sup>7</sup>.

### **Luciferase reporter assay**

The circCAMSAP1 or E2F1 3' UTR sequences containing WT or mutant miR-328-5p binding sites were synthesized and inserted into pMir-Report (Ambion, Austin, TX, USA) luciferase reporter vector, respectively. CRC cells were co-transfected with the luciferase reporter constructs, miR-328-5p mimics, and Renilla luciferase construct (Promega, Madison, WI, USA) and incubated for 24 hours. Then the luciferase activities were measured by the dual-luciferase reporter assay kit (Promega, Madison, WI, USA). The specific activity was expressed as the relative activity ratio of firefly to Renilla luciferase.

### **Biotin-miRNA pull-down**

As previously mentioned<sup>8</sup>, HCT15 cells were transfected with biotin-labeled miR-328-5p mimics, miR-3116 mimics or control biotin-mimics at a concentration of 20 nM, after which the cells were incubated for 48 hours. The cells were collected, fixed with 1% formaldehyde for 30 min and lysed in Co-IP buffer. The mixture was sonicated at high amplitude for 30 cycles of 30 secs (on/off) pulses. Then RNA was pulled down after incubating the cell lysate with streptavidin-coated magnetic beads (Life Technologies, CA, USA) for 30 min at 37°C. Finally, RNA in the solution was extracted followed by qRT-PCR.

### **Pre-CAMSAP1 pull-down**

Biotin-labeled probes targeting the flanked intron regions of circCAMSAP1 were synthesized by Sangon Biotech (Shanghai, China). The biotin-labeled probes were then used for pull-down as

mentioned previously, with some modifications<sup>8</sup>. In brief,  $1 \times 10^7$  cells were cross-linked by 1% formaldehyde for 30 min and then lysed in Co-IP buffer. The mixture was sonicated at high amplitude for 30 cycles of 30 secs (on/off) pulses. The cell lysis was incubated with Pre-CAMSAP1 probe-streptavidin beads (Life Technologies, CA, USA) mixture overnight at 37 °C, washed for 5 times and eluted using biotin elution buffer<sup>9</sup>. The interacting proteins were precipitated by acetone. Finally, the obtained proteins were used for Western Blot or Mass Spectrometry.

### **Cell proliferation, cell cycle and apoptosis assays**

Cell proliferation was examined using cell counting, EdU assay and FACS analysis of Ki-67 staining. For cell counting,  $5 \times 10^4$  cells were cultured in 10% FBS/DMEM and the cell number was counted by Coulter Counter (Beckman Coulter, Brea, CA, USA) every other day. For EdU assay, the experiments were performed using a Cell-Light EdU DNA Cell Proliferation Kit (Beyotime, Haimen, China). The EdU-positive cells were imaged and counted. For FACS analysis of Ki-67 staining, cells ( $2 \times 10^5$ ) were cultured in 10% FBS/DMEM medium in culture dishes and maintained at 37°C for 12 h. After cell attachment, the medium was replaced with serum-free DMEM medium. After 5 days, the cells were collected, followed by Ki-67 intracellular staining using mouse-anti-human Ki-67-PE staining set (eBioscience) following manufacture's instructions. Mean fluorescence intensity (MFI) were used to measure the expression of Ki-67. For plate colony formation, 500 cells were plated into 6-well plates and cultured for two weeks. Then the colonies were fixed with methanol and stained with 0.1% crystal violet for 15 minutes at room temperature. Cell colonies were counted and imaged. For soft agar colony formation assay, 500 cells were mixed in 0.3% low melting agarose with DMEM/10% FBS, and plated on 0.66% agarose-coated 6-well plates. Colony formation was monitored weekly. After 4 weeks, colonies were examined and photographed. For cell cycle analysis, cells were resuspended in cold phosphate buffered saline (PBS) and incubated in ice-cold 70% ethanol for 3h and resuspended in propidium iodide (PI) master mix (40 mg/ml PI and 100 mg/ml RNase in PBS) and then incubated at 37°C for 10 minutes before analysis with flow cytometry. Cell apoptosis was assessed using the Annexin V-FITC/ PI Apoptosis Detection Kit (BD Biosciences #556547) according to the manufacturer's instruction. The cell apoptosis data were analyzed by Flowjo V10 software (Tree Star, San Francisco, CA, USA).

### **Supplemental References**

1. Yang, F, Hu, A, Li, D, Wang, J, Guo, Y, Liu, Y, *et al.* (2019). Circ-HuR suppresses HuR expression and gastric cancer progression by inhibiting CNBP transactivation. *Mol Cancer* **18**: 158.
2. Liu, H, Bi, J, Dong, W, Yang, M, Shi, J, Jiang, N, *et al.* (2018). Invasion-related circular RNA circFNDC3B inhibits bladder cancer progression through the miR-1178-3p/G3BP2/SRC/FAK axis. *Mol Cancer* **17**: 161.
3. Zhang, Y, Yang, L, and Chen, LL (2016). Characterization of Circular RNAs. *Methods Mol Biol* **1402**: 215-227.
4. Zheng, QP, Bao, CY, Guo, WJ, Li, SY, Chen, J, Chen, B, *et al.* (2016). Circular RNA profiling reveals an abundant circHIPK3 that regulates cell growth by sponging multiple miRNAs. *Nature Communications* **7**.
5. Huang, XX, Li, Z, Zhang, Q, Wang, WZ, Li, BW, Wang, L, *et al.* (2019). Circular RNA AKT3 upregulates PIK3R1 to enhance cisplatin resistance in gastric cancer via miR-198 suppression. *Molecular Cancer* **18**.
6. Fowler, CB, Man, YG, Zhang, S, O'Leary, TJ, Mason, JT, and Cunningham, RE (2011). Tissue microarrays: construction and uses. *Methods Mol Biol* **724**: 23-35.
7. Zeng, K, Wang, Z, Ohshima, K, Liu, Y, Zhang, W, Wang, L, *et al.* (2016). BRAF V600E mutation correlates with suppressive tumor immune microenvironment and reduced disease-free survival in Langerhans cell histiocytosis. *Oncoimmunology* **5**: e1185582.
8. Zeng, K, Chen, X, Xu, M, Liu, X, Hu, X, Xu, T, *et al.* (2018). CircHIPK3 promotes colorectal cancer growth and metastasis by sponging miR-7. *Cell Death Dis* **9**: 417.
9. Chu, C, Zhang, QC, da Rocha, ST, Flynn, RA, Bharadwaj, M, Calabrese, JM, *et al.* (2015). Systematic discovery of Xist RNA binding proteins. *Cell* **161**: 404-416.
